# Supplementary material for: Interleukin-22 Mediates the Chemotactic Migration of Breast Cancer Cells and Macrophage Infiltration of the Bone Microenvironment by Potentiating S1P/SIPR Signaling
Source: MDPI journal article supplement (doi:10.3390/cells9010131), 2020-01-06
Supplement: s1 [file s1]

## Supplementary Information

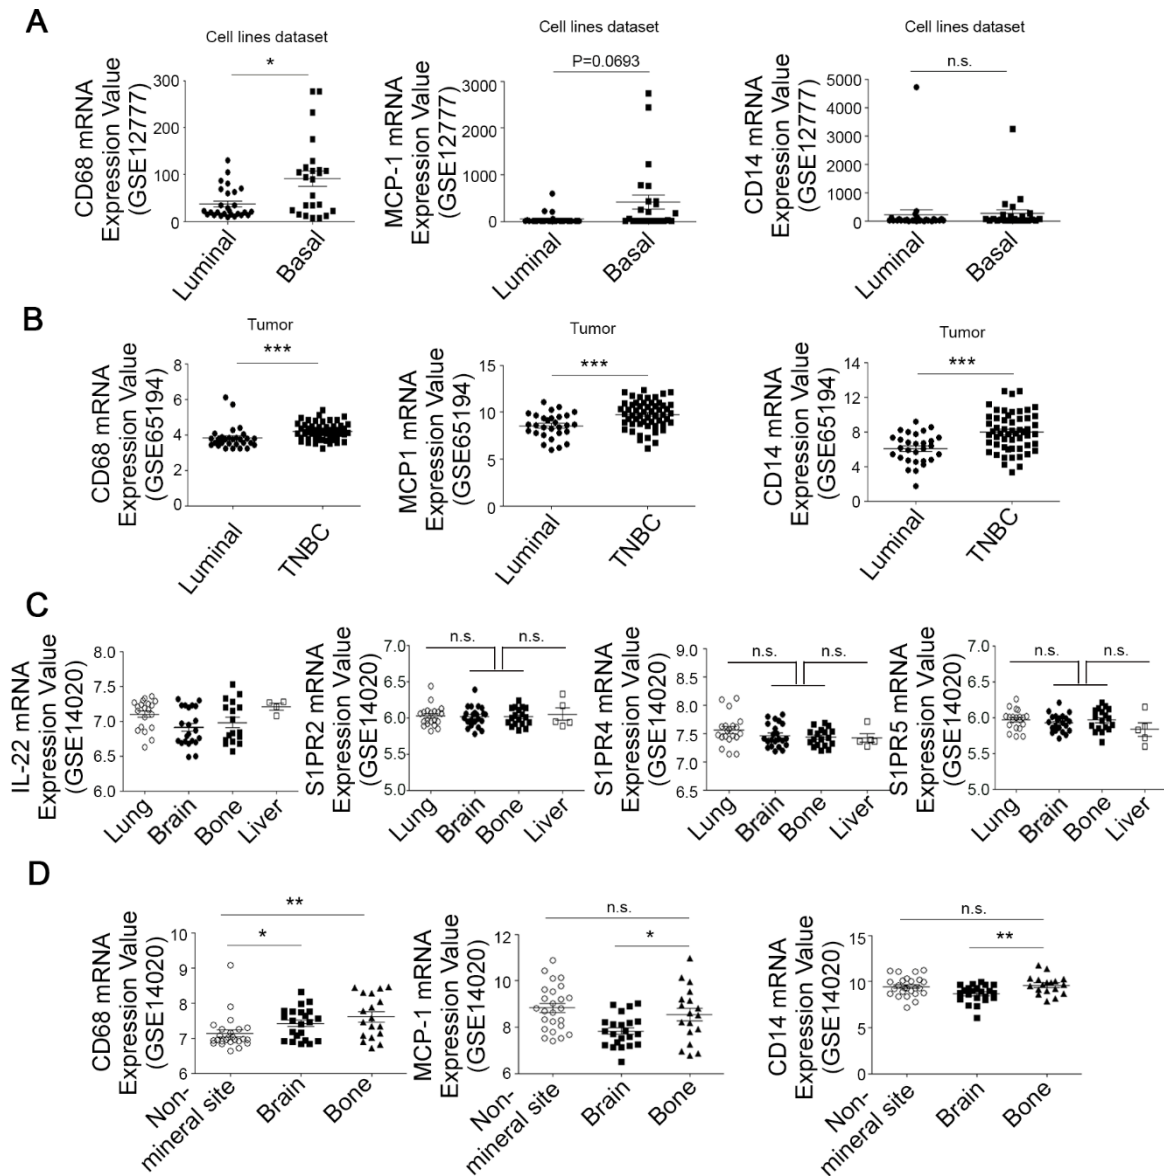

### Figure S1

**Figure S1.** Comparison of CD68, MCP-1, CD14, IL-22, and S1PR2-5 expression in breast tumors. (A, B) CD68, MCP-1, and CD14 mRNA expression levels in the luminal and basal-like/triple-negative subtypes of human breast cancers from the GSE12777 (A) and GSE65194 (B) dataset were compared using the chi-square test. (C, D) IL-22, S1PR2-5 (C), CD68, MCP-1, and CD14 (D) mRNA expression levels in lung, brain, bone, and liver metastasis-positive human breast cancer mined from the GSE14020 dataset were compared. Values are expressed as a mean  $\pm$  SD. Comparisons were

performed with ANOVA (multiple groups). \*P < 0.05, \*\*P < 0.005, \*\*\*P < 0.001 vs corresponding controls. n.s., not significant.

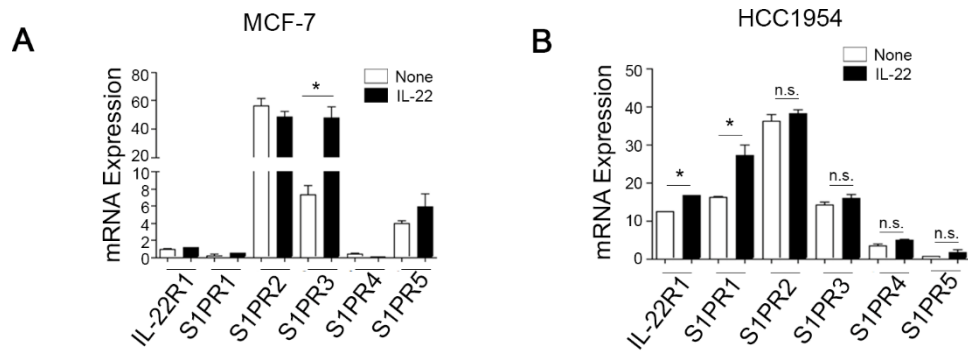

**Figure S2**

**Figure S2.** (A, B) MCF-7 (A) and HCC1954 (B) cells were treated with IL-22 for 24 h and IL-22R1 and S1PR1-4 transcript levels were analyzed by qPCR. \*P < 0.05 vs corresponding controls.

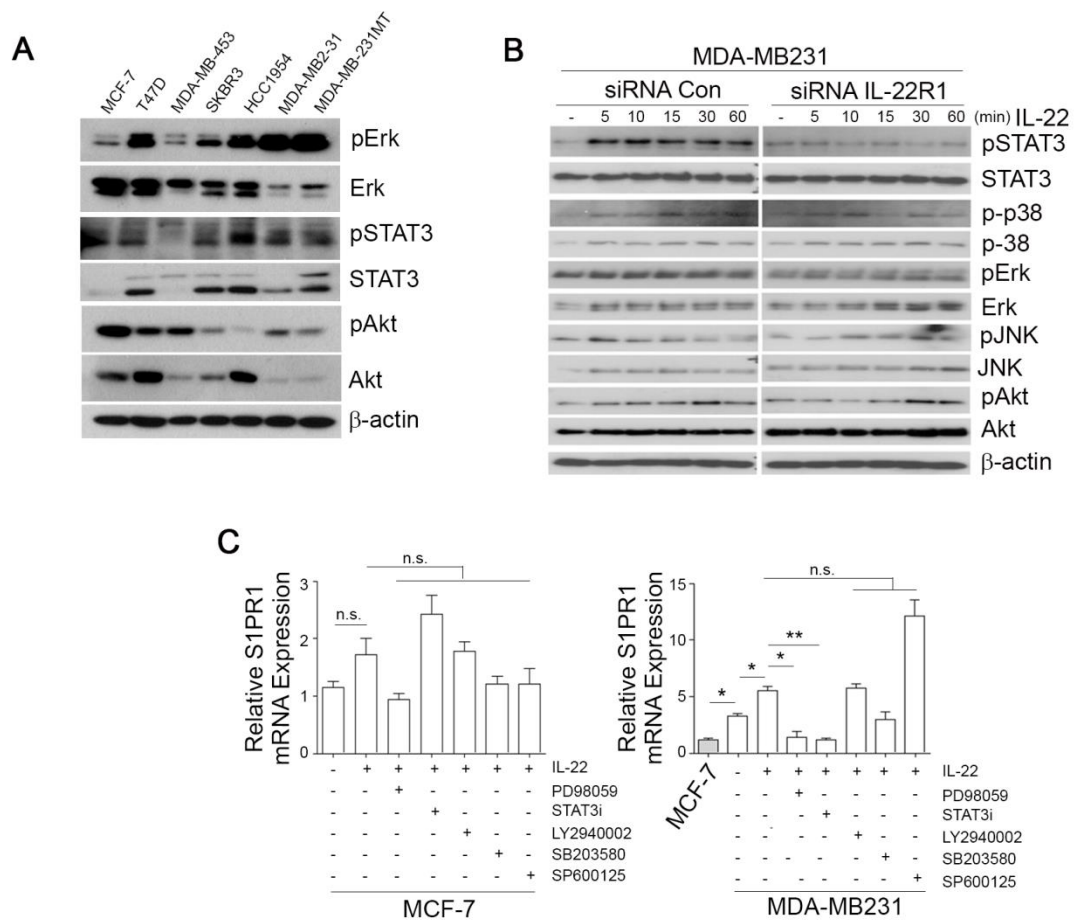

**Figure S3**

**Figure S3.** (A) pERK, ERK, pSTAT3, STAT3, pAKT, and AKT protein expressions were determined by immunoblotting assay in low metastatic (MCF-7, T47D, MDA-MB453, and SKBR3) and highly metastatic (HCC1954, MDA-MB231, and MDA-MB231MT) breast cancer cell lines. (B) MDA-MB231 cells were transfected with control siRNA or siRNA targeting IL-22R1 and treated with IL-22 for the indicated times. pSTAT3, STAT3, p-p38, p38, pERK, ERK, pJNK, JNK, pAKT, and AKT protein expressions were determined by immunoblotting assay. (C) MCF-7 and MDA-MB231 cells were treated with IL-22 in the presence or absence of DMSO, PD98059 (ERK inhibitor), STAT3i (STAT3 inhibitor), LY2940002 (PI3K inhibitor), SB203580 (p38 inhibitor), or SP600125 (JNK inhibitor) for 24 h and S1PR1 transcript level was analyzed by qPCR. \*P < 0.05, \*\*P < 0.005 vs corresponding control.

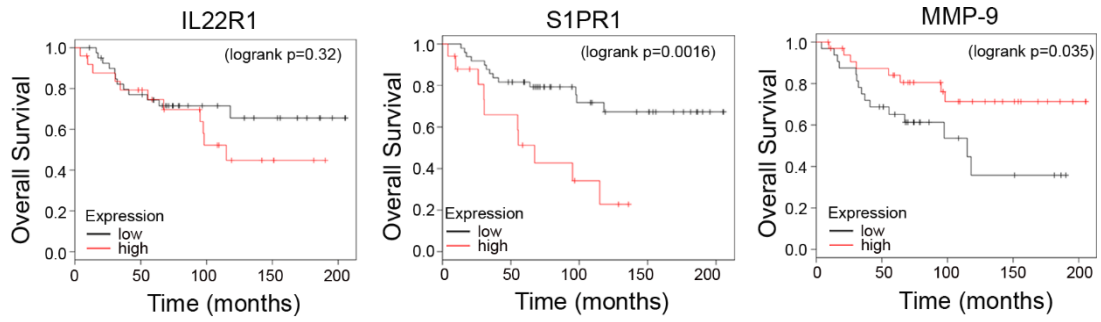

**Figure S4**

**Figure S4.** Overall survival curve for tumor IL-22R1, S1PR1, and MMP-9 expression in breast cancer patients. (n=425). The significance of the associations was determined by log rank test.

**Table S1. Primers used in this study**

| Gene name     | Primer sequences |                              |
|---------------|------------------|------------------------------|
| human IL-22R1 | Forward          | 5'-GACTCCATTTGGGTCATCGC-3'   |
|               | Reverse          | 5'-CCTGTCACCGTGTGTCATCA-3'   |
| human S1P1    | Forward          | 5'-TCCATGTAAACTGGGTCAAG-3'   |
|               | Reverse          | 5'-AAAGGTGCTGTAGGGGTTAG-3'   |
| human S1P2    | Forward          | 5'-TTTTAAAATTGGGACAGGGT-3'   |
|               | Reverse          | 5'-TTCTCCACAGGATTTAGCAA-3'   |
| human S1P3    | Forward          | 5'-ATGGCATTGCTCTTGTTTA-3'    |
|               | Reverse          | 5'-TATTTTTCCCTTAACCCAGC-3'   |
| human S1P4    | Forward          | 5'-AACTGTGGGTATGACTCTGG-3'   |
|               | Reverse          | 5'-ATACAGTTGGAACAGTTGGG-3'   |
| human S1P5    | Forward          | 5'-ACCATTCTAGATCGAACCGT-3'   |
|               | Reverse          | 5'-CACCACCCGAAGATGAACAT-3'   |
| human GAPDH   | Forward          | 5'-TGTTGCCATCAATGACCCCTT-3'  |
|               | Reverse          | 5'-CTCCACGACGTACTIONCAGCG-3' |
